# Supplementary material for: Global warming increases the frequency of river floods in Europe
Source: Copernicus journal article supplement (doi:10.5194/hess-19-2247-2015), 2015-05-11
Supplement: Supplementary file 1 [file hess-19-2247-2015-supplement.pdf]

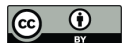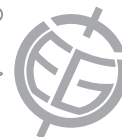

*Supplement of*

## **Global warming increases the frequency of river floods in Europe**

**L. Alfieri et al.**

*Correspondence to:* L. Alfieri ([lorenzo.alfieri@jrc.ec.europa.eu](mailto:lorenzo.alfieri@jrc.ec.europa.eu))

The copyright of individual parts of the supplement might differ from the CC-BY 3.0 licence.

## Supplementary figures

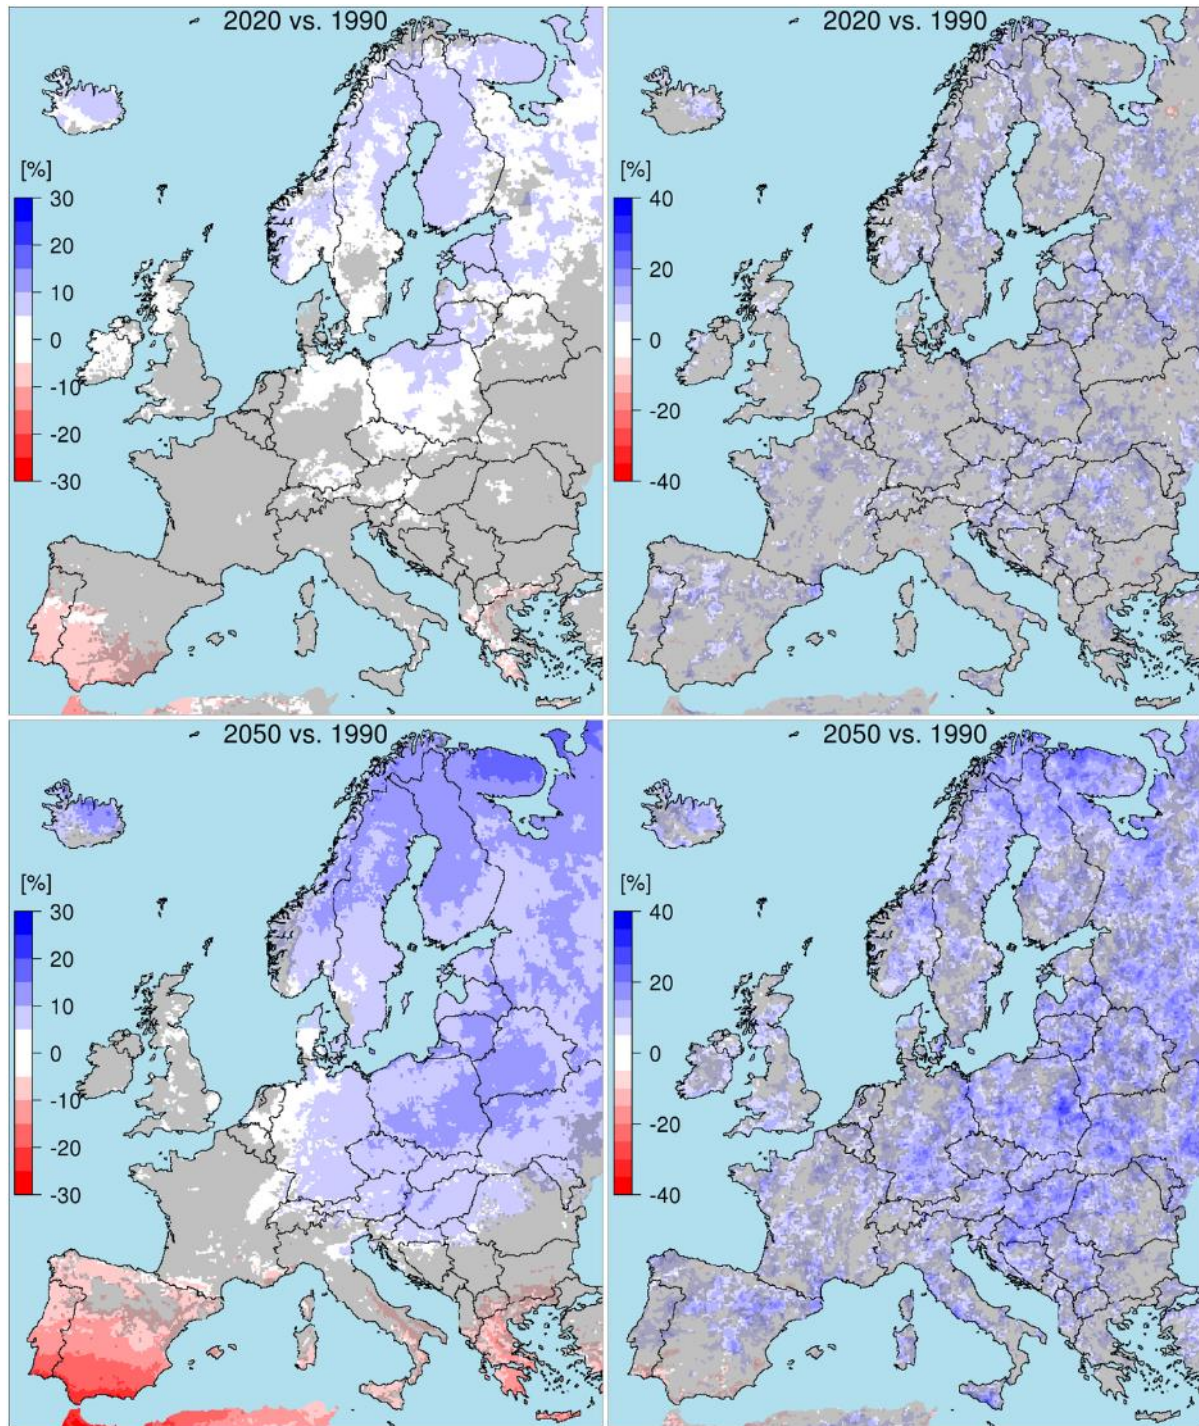

Figure S1: Relative change in annual precipitation ( $pr_{year}$ , left) and annual maximum daily precipitation ( $pr_{MAX}$ , right) for the time slice 2006-2035 (top) and 2036-2065 (bottom). Data points with  $CV > 1$  are greyed out.



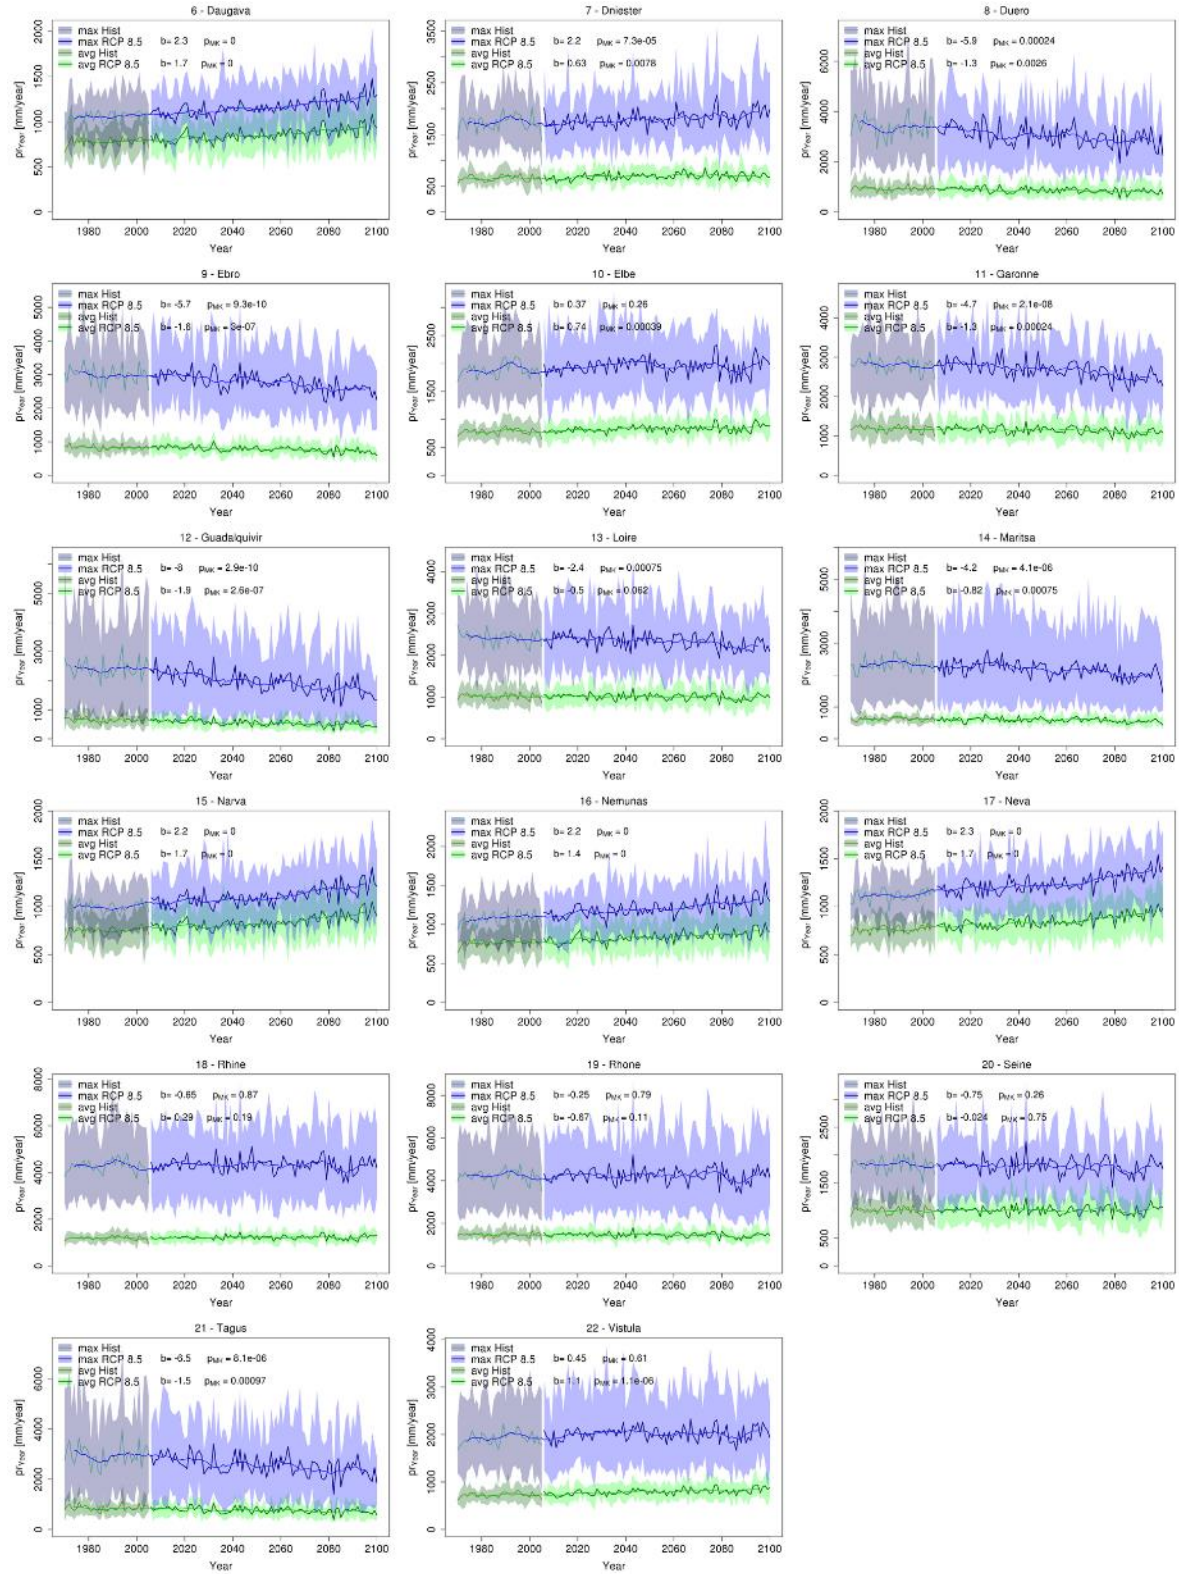

Figure S2: Annual precipitation total ( $pr_{year}$ ) for selected European river basins over time. Basins location is shown in Figure 1 (in yellow). Basin average (green shades) and maximum point value (blue shades) of the ensemble are shown together with the ensemble mean (thick lines) and the 10-year average (thin lines).

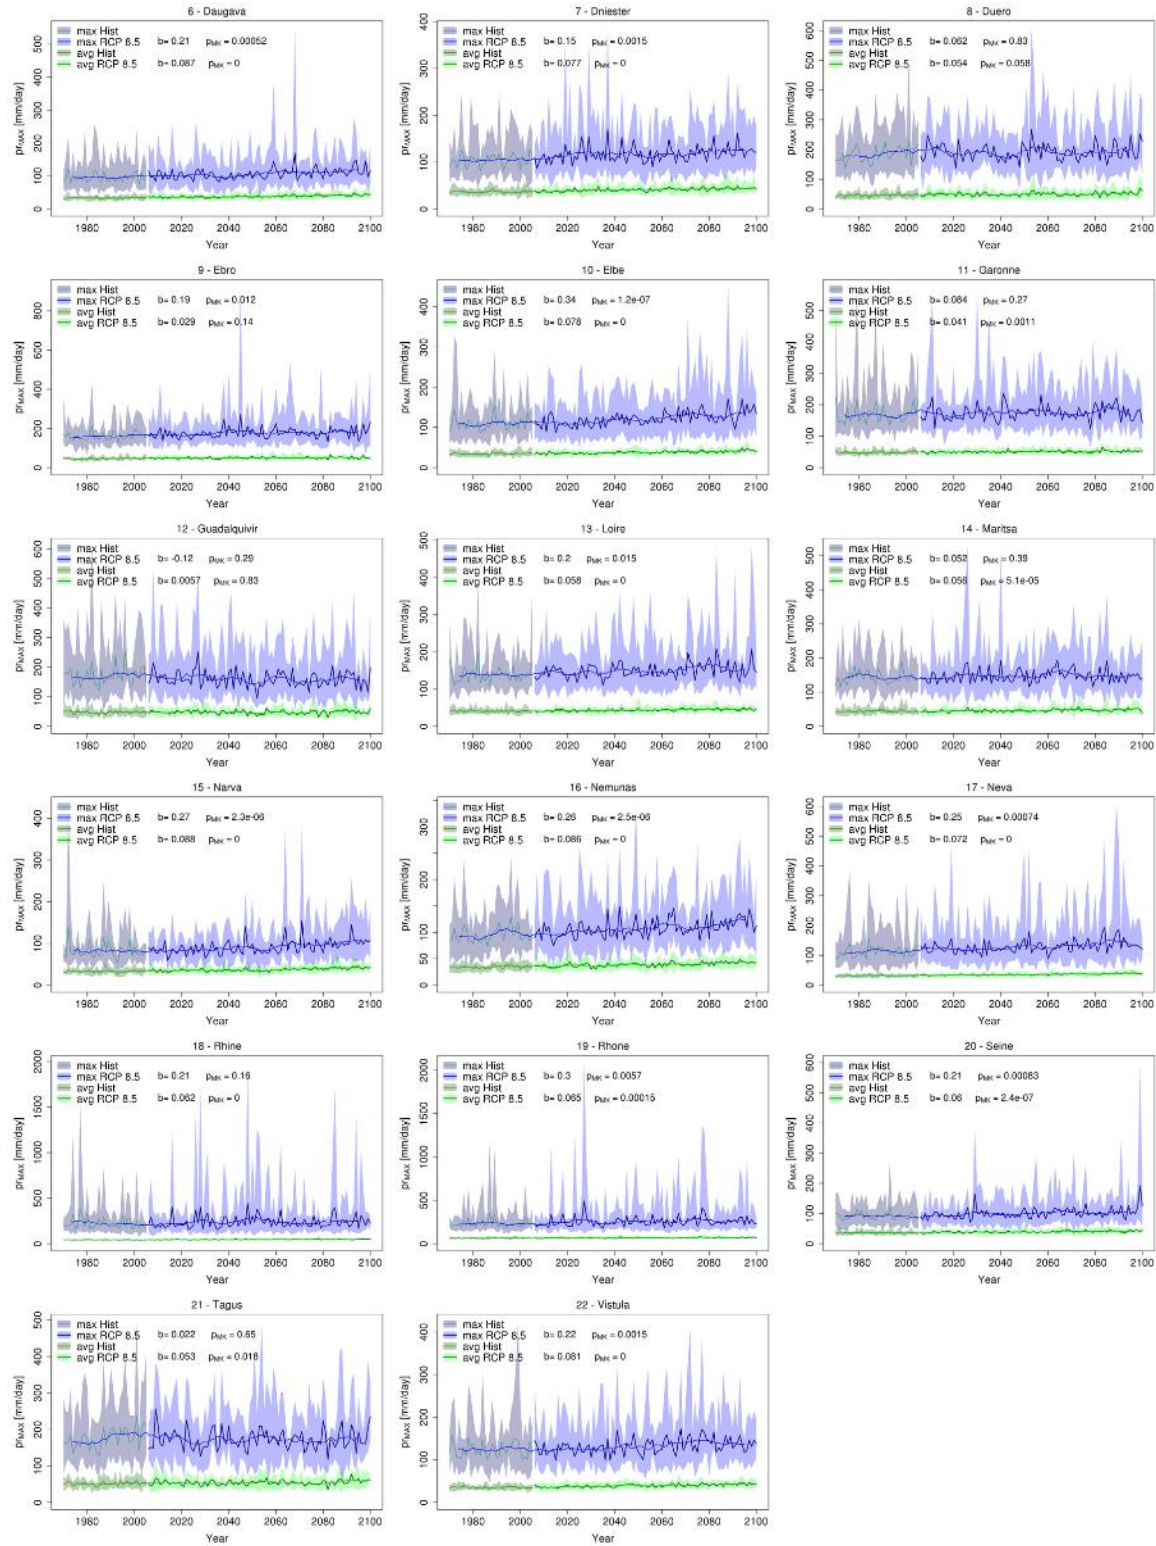

Figure S3: Annual maximum daily precipitation ( $pr_{MAX}$ ) for selected European river basins over time. Basins location is shown in Figure 1 (in yellow). Basin average (green shades) and maximum point value (blue shades) of the ensemble are shown together with the ensemble mean (thick lines) and the 10-year average (thin lines).



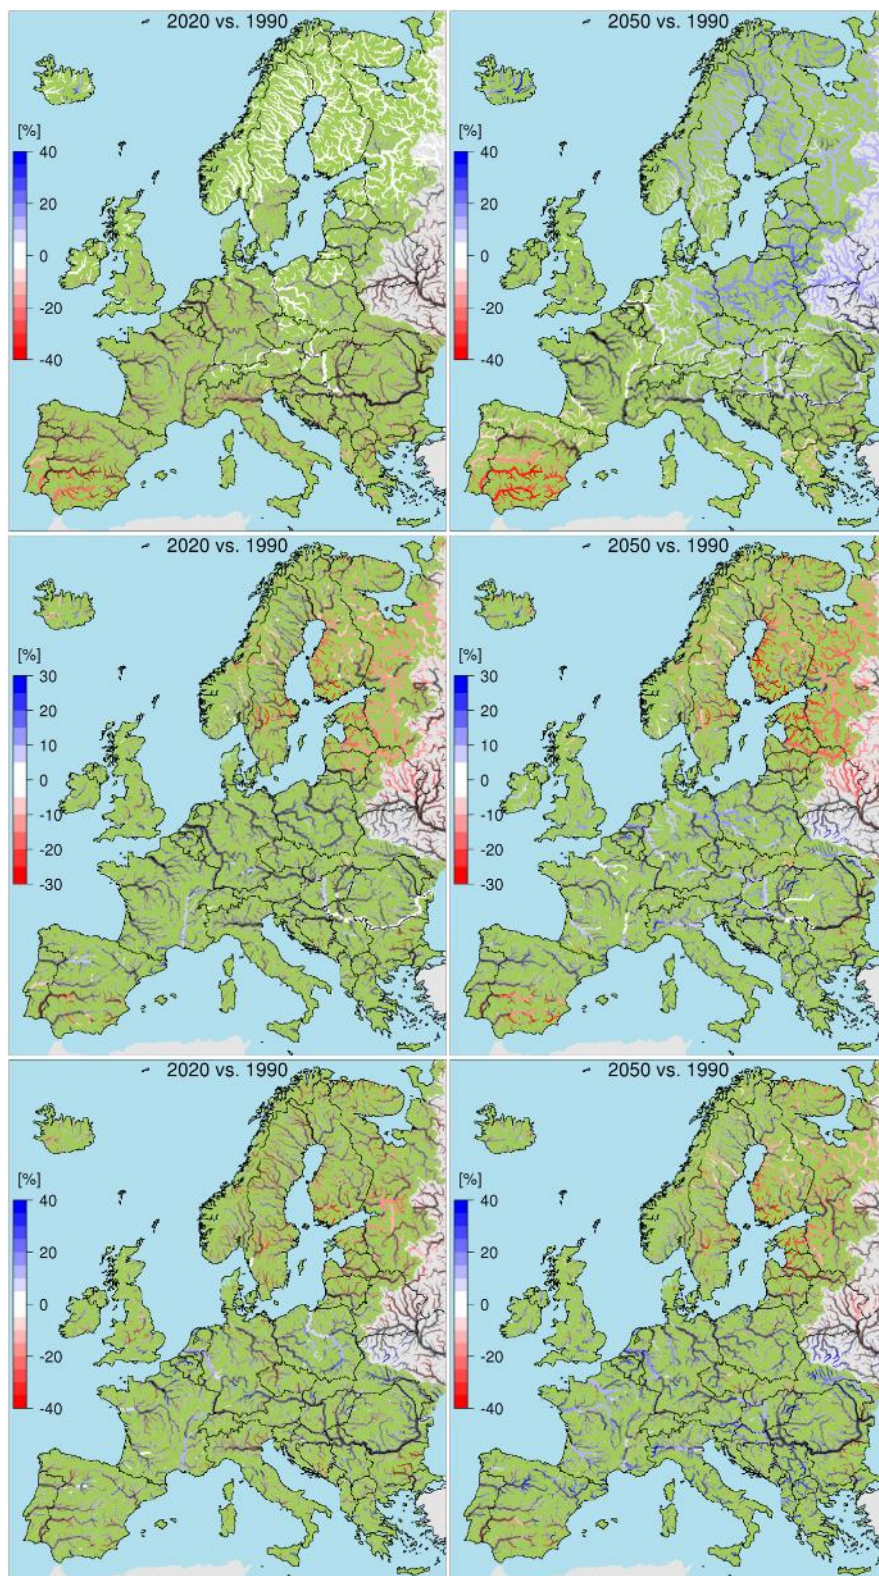

Figure S4: Relative change in average streamflow  $\bar{Q}$  (top), mean annual daily peak flow  $\overline{Q_{MAX}}$  (center) and 100-year daily peak flow  $Q_{100}$  (bottom) for the time slice 2006-2035 (left) and 2036-2065 (right). Data points with  $CV > 1$  are greyed out.

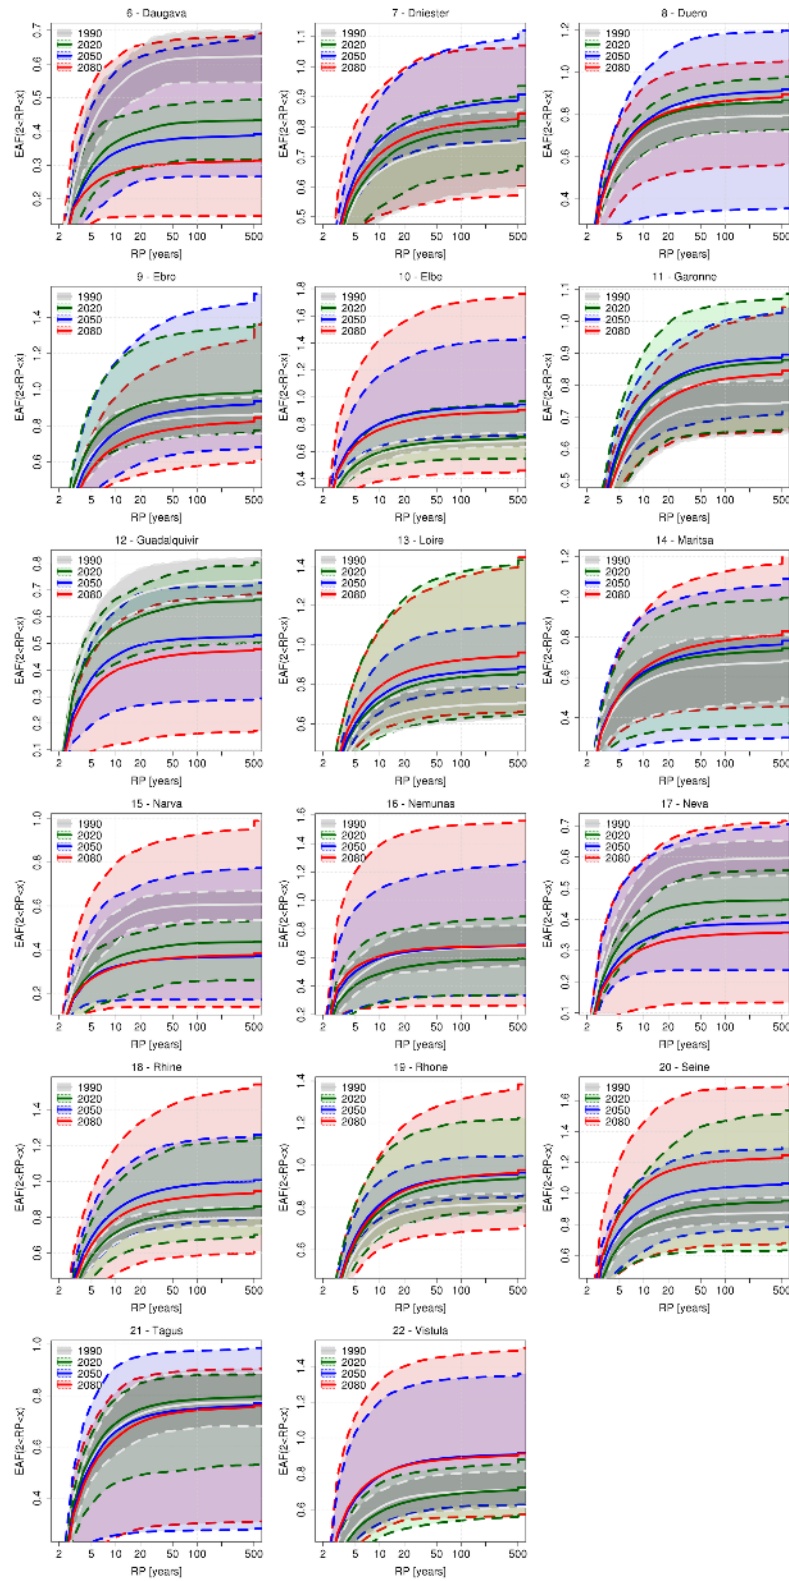

Figure S5: Expected annual frequency of peak flows with return period larger than 2 years for selected European river basins (see location in Figure 1) for the baseline simulation and the three future time slices.
